# Supplementary material for: Higher Carbohydrate Antigen 125 Levels Are Associated with Increased Risk of Coronary Heart Disease in Elderly Chinese: A Population-Based Case-Control Study
Source: PLoS One. 2013 Nov 26;8(11):e81328. doi: 10.1371/journal.pone.0081328 (PMC3841119; doi:10.1371/journal.pone.0081328)
Supplement: Table S1 — The association between CA-125 level and CHD with nonfatal MI in Chinese older population. (DOCX) [file pone.0081328.s001.docx]

| **Table S1.** The association between CA-125 level and CHD with nonfatal MI in Chinese older population | | | | | |
| --- | --- | --- | --- | --- | --- |
| **Quartile** | **CA-125 level (U/ml)** | **Cases, n (%)** | **Controls, n (%)** | **OR (95% CI)** | **OR*** **(95% CI)** |
| First | ≤ 1.31 | 28 (13.33) | 881 (24.95) | 1.00 | 1.00 |
| Second | 1.31-5.54 | 39 (18.57) | 884 (25.04) | 1.39 (0.85-2.28) | 1.25 (0.73-2.12) |
| Third | 5.54-9.90 | 57 (27.14) | 877 (24.84) | 2.05 (1.29-3.25) | 1.87 (1.14-3.08) |
| Fourth | ≥ 9.90 | 86 (40.95) | 889 (25.18) | 3.04 (1.97-4.71) | 2.76 (1.73-4.41) |
|  |  |  |  | *P*trend< 0.001 | *P*trend< 0.001 |
| OR: Crude OR.  OR*:Adjusted for age, gender, smoking, drinking, BMI, physical activity, hypertension, dyslipidemia, diabetes mellitus, medication history and family history of CHD and myocardial infarction. | | | | | |
